# Supplementary material
Source: publisher figshare collection journal article supplement (https://acs.figshare.com/ndownloader/files/5155063)

# **Rhodium-Catalyzed Novel Trifluoromethylation at $\alpha$ -Position of $\alpha,\beta$ -Unsaturated Ketones**

Kazuyuki SATO, Masaaki OMOTE, Akira ANDO\*, Itsumaro KUMADAKI\*

*Faculty of Pharmaceutical Sciences, Setsunan University  
45-1, Nagaotoge-cho, Hirakata, Osaka 573-0101, Japan*

## **Supporting Information**

|                               |        |
|-------------------------------|--------|
| General Information .....     | S2     |
| Experimental Section .....    | S2     |
| General Procedure .....       | S2-S5  |
| References .....              | S5     |
| <sup>1</sup> H NMR Data ..... | S6-S14 |

## General Information.

<sup>1</sup>H-NMR and <sup>13</sup>C-NMR spectra were recorded on JNM-GX400 spectrometers and tetramethylsilane (TMS) was used as an internal standard. <sup>19</sup>F-NMR spectra were recorded on Hitachi FT-NMR R-1500 and benzotrifluoride (BTF) was used as an internal standard. Mass spectra were obtained on JEOL JMS-700T spectrometers. IR spectra were recorded on Hitachi 270-30 Infrared spectrophotometer. Gas-liquid chromatography (GLC) was carried out on a Hitachi 263-50 gas chromatograph (column, 5% SE-30 3 mm x 2 m, carrier, N<sub>2</sub> at 30 ml/min). Peak areas were calculated on a Hitachi D-2000 Chromato-Integrator. All commercially available reagents were used without further purification.

## Experimental Section.

Methyl 4-(3-oxo-1-butenyl)benzoate (**2g**) and 4-(4-methoxyphenyl)-3-buten-2-one (**2h**) were synthesized according to the literatures 1 and 2.

## General Procedure

### 4-Phenyl-3-trifluoromethyl-2-butanone (**7a**)

Under an atmosphere of Ar, a solution of **1** (ca 1 mL) in THF (2 mL) was added to a mixture of **2a** (292 mg, 2 mmol) and RhCl(PPh<sub>3</sub>)<sub>3</sub> (37 mg, 2 mol%) in THF (6 mL) at -30 °C. 1.0 M Et<sub>2</sub>Zn in hexane (3 mL, 3 mmol) was gradually added to the solution at 0 °C, and then the solution was stirred at RT for 0.5 h. The solution was quenched with 10% HCl, and extracted with Et<sub>2</sub>O. The Et<sub>2</sub>O layer was washed with sat. NaCl and dried with MgSO<sub>4</sub>. The solvent was removed *in vacuo* and the residue was purified by column chromatography (AcOEt : Hexane = 1 : 9) to give **7a** (332 mg, 77%). **7a**: colorless oil; <sup>1</sup>H NMR (CDCl<sub>3</sub>) δ: 2.07 (s, 3H), 3.06 (dd, 1H, *J* = 13.9, 4.2 Hz), 3.18 (dd, 1H, *J* = 13.9, 10.9 Hz), 3.56 (ddd, 1H, *J* = 10.9, 8.3, 4.2 Hz), 7.12-7.32 (m, 5H); <sup>13</sup>C NMR (CDCl<sub>3</sub>) δ: 31.8 (q, *J* = 1.6 Hz), 31.9 (q, *J* = 2.7 Hz), 57.6 (q, *J* = 24.9 Hz), 124.4 (q, *J* = 280.3 Hz), 127.1, 128.7, 128.8, 136.4, 201.3 (q, *J* = 1.9 Hz); <sup>19</sup>F NMR (CDCl<sub>3</sub>) δ: -4.42 (d, 3F, *J* = 8.3 Hz); MS *m/z*: 216 (M<sup>+</sup>); HRMS Calc. C<sub>11</sub>H<sub>11</sub>OF<sub>3</sub>: 216.08 (M<sup>+</sup>), Found: 216.08; IR (neat) cm<sup>-1</sup>: 1734, 1264.

### 1,3-Diphenyl-2-trifluoromethyl-1-propanone (**7b**)

Under an atmosphere of Ar, a solution of **1** (ca 1 mL) in THF (2 mL) was added to a mixture of **2b** (417 mg, 2 mmol) and RhCl(PPh<sub>3</sub>)<sub>3</sub> (37 mg, 2 mol%) in THF (6 mL) at -30 °C. 1.0 M Et<sub>2</sub>Zn in hexane (3 mL, 3 mmol) was gradually added to the solution at 0 °C, and then the solution was stirred at RT for 0.5 h. The solution was quenched with 10% HCl, and extracted with Et<sub>2</sub>O. The Et<sub>2</sub>O layer was washed with sat. NaCl and dried with MgSO<sub>4</sub>. The solvent was removed *in vacuo* and the residue was purified by column chromatography (AcOEt : Hexane = 1 : 9) to give **7b** (171 mg, 31%). **7b**: colorless oil; <sup>1</sup>H NMR (CDCl<sub>3</sub>) δ: 3.20 (dd, 1H, *J* = 13.8, 4.1 Hz), 3.43 (dd, 1H, *J* = 13.8, 10.7 Hz), 4.48 (m, 1H), 7.18 (m, 5H), 7.39 (m, 2H),

7.53 (m, 1H), 7.74 (m, 2H);  $^{13}\text{C}$  NMR ( $\text{CDCl}_3$ )  $\delta$ : 32.7 (q,  $J = 2.6$  Hz), 51.4 (q,  $J = 25.1$  Hz), 124.5 (q,  $J = 280.8$  Hz), 126.9, 128.4, 128.6, 128.6, 128.8, 133.7, 136.6, 136.8, 193.9 (q,  $J = 1.8$  Hz);  $^{19}\text{F}$  NMR ( $\text{CDCl}_3$ )  $\delta$ : -3.63 (d, 3F,  $J = 7.6$  Hz); MS  $m/z$ : 278 ( $\text{M}^+$ ); HRMS Calc.  $\text{C}_{16}\text{H}_{13}\text{OF}_3$ : 278.09 ( $\text{M}^+$ ), Found: 278.09; IR (neat)  $\text{cm}^{-1}$ : 1694, 1266.

### 1-Phenyl-2-trifluoromethyl-1-pentanone (7c)

Under an atmosphere of Ar, a solution of **1** (ca 1 mL) in THF (2 mL) was added to a mixture of **2c** (320 mg, 2 mmol) and  $\text{RhCl}(\text{PPh}_3)_3$  (37 mg, 2 mol%) in THF (6 mL) at  $-30^\circ\text{C}$ . 1.0 M  $\text{Et}_2\text{Zn}$  in hexane (3 mL, 3 mmol) was gradually added to the solution at  $0^\circ\text{C}$ , and then the solution was stirred at RT for 0.5 h. The solution was quenched with 10% HCl, and extracted with  $\text{Et}_2\text{O}$ . The  $\text{Et}_2\text{O}$  layer was washed with sat. NaCl and dried with  $\text{MgSO}_4$ . The solvent was removed *in vacuo* and the residue was purified by column chromatography (AcOEt : Hexane = 1 : 9) to give **7c** (160 mg, 35%). **7c**: colorless oil;  $^1\text{H}$  NMR ( $\text{CDCl}_3$ )  $\delta$ : 0.91 (t, 3H,  $J = 7.3$  Hz), 1.33 (m, 2H), 1.86 (m, 1H), 2.09 (m, 1H), 4.21 (m, 1H), 7.52 (m, 2H), 7.64 (m, 1H), 7.97 (m, 2H);  $^{13}\text{C}$  NMR ( $\text{CDCl}_3$ )  $\delta$ : 13.9, 20.3, 29.0 (q,  $J = 2.1$  Hz), 49.1 (q,  $J = 25.1$  Hz), 124.9 (q,  $J = 280.2$  Hz), 128.4, 128.8, 133.8, 136.8, 194.5 (q,  $J = 1.4$  Hz);  $^{19}\text{F}$  NMR ( $\text{CDCl}_3$ )  $\delta$ : -3.48 (d, 3F,  $J = 8.3$  Hz); MS  $m/z$ : 230 ( $\text{M}^+$ ); HRMS Calc.  $\text{C}_{12}\text{H}_{13}\text{OF}_3$ : 230.09 ( $\text{M}^+$ ), Found: 230.09; IR (neat)  $\text{cm}^{-1}$ : 1696, 1240.

### 3-Trifluoromethyl-2-nonanone (7e)

Under an atmosphere of Ar, a solution of **1** (ca 1 mL) in THF (2 mL) was added to a mixture of **2e** (0.33 mL, 2 mmol) and  $\text{RhCl}(\text{PPh}_3)_3$  (37 mg, 2 mol%) in THF (6 mL) at  $-30^\circ\text{C}$ . 1.0 M  $\text{Et}_2\text{Zn}$  in hexane (3 mL, 3 mmol) was gradually added to the solution at  $0^\circ\text{C}$ , and then the solution was stirred at RT for 0.5 h. The solution was quenched with 10% HCl, and extracted with  $\text{Et}_2\text{O}$ . The  $\text{Et}_2\text{O}$  layer was washed with sat. NaCl and dried with  $\text{MgSO}_4$ . The solvent was removed *in vacuo* and the residue was purified by column chromatography (AcOEt : Hexane = 1 : 9) to give **7e** (280 mg, 67%). **7e**: colorless oil;  $^1\text{H}$  NMR ( $\text{CDCl}_3$ )  $\delta$ : 0.88 (t, 3H,  $J = 7.1$  Hz), 1.29 (m, 8H), 1.75 (m, 1H), 1.86 (m, 1H), 2.28 (s, 3H), 3.17 (m, 1H);  $^{13}\text{C}$  NMR ( $\text{CDCl}_3$ )  $\delta$ : 14.0, 22.5, 25.7 (q,  $J = 2.5$  Hz), 26.8, 28.9, 30.0 (q,  $J = 2.2$  Hz), 31.4, 56.5 (q,  $J = 25.4$  Hz), 124.9 (q,  $J = 279.6$  Hz), 202.0 (q,  $J = 1.2$  Hz);  $^{19}\text{F}$  NMR ( $\text{CDCl}_3$ )  $\delta$ : -4.14 (d, 3F,  $J = 8.9$  Hz); MS  $m/z$ : 210 ( $\text{M}^+$ ); HRMS Calc.  $\text{C}_{10}\text{H}_{17}\text{OF}_3$ : 210.12 ( $\text{M}^+$ ), Found: 210.12; IR (neat)  $\text{cm}^{-1}$ : 2964, 2936, 1734, 1262, 1166, 1130, 1108.

### 2-Methyl-1,1,1-trifluoro-3-octanone (7f)

Under an atmosphere of Ar, a solution of **1** (ca 1 mL) in THF (2 mL) was added to a mixture of **2f** (0.29 mL, 2 mmol) and  $\text{RhCl}(\text{PPh}_3)_3$  (37 mg, 2 mol%) in THF (6 mL) at  $-30^\circ\text{C}$ . 1.0 M  $\text{Et}_2\text{Zn}$  in hexane (3 mL, 3 mmol) was gradually added to the solution at  $0^\circ\text{C}$ , and then the solution was stirred at RT for 0.5 h. The solution was quenched with 10% HCl, and extracted

with Et<sub>2</sub>O. The Et<sub>2</sub>O layer was washed with sat. NaCl and dried with MgSO<sub>4</sub>. The solvent was removed *in vacuo* and the residue was purified by column chromatography (AcOEt : Hexane = 1 : 9) to give **7f** (233 mg, 59%). **7f**: colorless oil; <sup>1</sup>H NMR (CDCl<sub>3</sub>) δ: 0.90 (t, 3H, *J* = 7.2 Hz), 1.24-1.35 (m, 4H), 1.32 (d, 3H, *J* = 7.6 Hz), 1.60 (q, 2H, *J* = 7.4 Hz), 2.52 (dt, 1H, *J* = 17.9, 7.2 Hz), 2.60 (dt, 1H, *J* = 17.9, 7.5 Hz), 3.27 (qq, 1H, *J* = 9.0, 7.2 Hz); <sup>13</sup>C NMR (CDCl<sub>3</sub>) δ: 10.5 (q, *J* = 3.1 Hz), 13.9, 22.4, 22.9, 31.1, 42.3 (q, *J* = 1.8 Hz), 49.9 (q, *J* = 26.6 Hz), 125.1 (q, *J* = 279.4 Hz), 204.2 (q, *J* = 1.7 Hz); <sup>19</sup>F NMR (CDCl<sub>3</sub>) δ: -5.72 (d, 3F, *J* = 9.0 Hz); MS *m/z*: 196 (M<sup>+</sup>); HRMS Calc. C<sub>9</sub>H<sub>15</sub>OF<sub>3</sub>: 196.11 (M<sup>+</sup>), Found: 196.11; IR (neat) cm<sup>-1</sup>: 2964, 2880, 1732, 1262, 1176, 1110.

#### Methyl 4-(3-oxo-2-trifluoromethyl-butyl)benzoate (**7g**)

Under an atmosphere of Ar, a solution of **1** (ca 1 mL) in THF (2 mL) was added to a mixture of **2g** (408 mg, 2 mmol) and RhCl(PPh<sub>3</sub>)<sub>3</sub> (37 mg, 2 mol%) in THF (6 mL) at -30 °C. 1.0 M Et<sub>2</sub>Zn in hexane (3 mL, 3 mmol) was gradually added to the solution at 0 °C, and then the solution was stirred at RT for 0.5 h. The solution was quenched with 10% HCl, and extracted with Et<sub>2</sub>O. The Et<sub>2</sub>O layer was washed with sat. NaCl and dried with MgSO<sub>4</sub>. The solvent was removed *in vacuo* and the residue was purified by column chromatography (AcOEt : Hexane = 1 : 9) to give **7g** (357 mg, 65%). **7g**: colorless oil; <sup>1</sup>H NMR (CDCl<sub>3</sub>) δ: 2.11 (s, 3H), 3.09 (dd, 1H, *J* = 13.6, 4.0 Hz), 3.26 (dd, 1H, *J* = 13.6, 10.7 Hz), 3.59 (m, 1H), 3.91 (s, 3H), 7.25 (m, 2H), 7.98 (m, 2H); <sup>13</sup>C NMR (CDCl<sub>3</sub>) δ: 31.6 (q, *J* = 2.4 Hz), 31.8 (q, *J* = 1.4 Hz), 52.1, 57.2 (q, *J* = 25.0 Hz), 124.2 (q, *J* = 281.1 Hz), 128.8, 129.1, 130.1, 141.8, 166.6, 200.7; <sup>19</sup>F NMR (CDCl<sub>3</sub>) δ: -4.24 (d, 3F, *J* = 7.6 Hz); MS *m/z*: 274 (M<sup>+</sup>); HRMS Calc. C<sub>13</sub>H<sub>13</sub>O<sub>3</sub>F<sub>3</sub>: 274.08 (M<sup>+</sup>), Found: 274.08; IR (neat) cm<sup>-1</sup>: 1728, 1286, 1184, 1160, 1112.

#### 4,4,4-Trifluoro-3-(4-methoxybenzyl)-2-butanone (**7h**)

Under an atmosphere of Ar, a solution of **1** (ca 1 mL) in THF (2 mL) was added to a mixture of **2h** (352 mg, 2 mmol) and RhCl(PPh<sub>3</sub>)<sub>3</sub> (37 mg, 2 mol%) in THF (6 mL) at -30 °C. 1.0 M Et<sub>2</sub>Zn in hexane (3 mL, 3 mmol) was gradually added to the solution at 0 °C, and then the solution was stirred at RT for 0.5 h. The solution was quenched with 10% HCl, and extracted with Et<sub>2</sub>O. The Et<sub>2</sub>O layer was washed with sat. NaCl and dried with MgSO<sub>4</sub>. The solvent was removed *in vacuo* and the residue was purified by column chromatography (AcOEt : Hexane = 1 : 9) to give **7h** (322 mg, 65%). **7h**: colorless oil; <sup>1</sup>H NMR (CDCl<sub>3</sub>) δ: 2.07 (s, 3H), 3.01 (dd, 1H, *J* = 13.8, 4.0 Hz), 3.12 (dd, 1H, *J* = 13.8, 10.7 Hz), 3.52 (m, 1H), 3.78 (s, 3H), 6.83 (m, 2H), 7.08 (m, 2H); <sup>13</sup>C NMR (CDCl<sub>3</sub>) δ: 31.1 (q, *J* = 2.6 Hz), 31.9 (m), 55.2, 57.8 (q, *J* = 24.6 Hz), 114.2, 124.4 (q, *J* = 280.3 Hz), 128.3, 129.8, 158.6, 201.6; <sup>19</sup>F NMR (CDCl<sub>3</sub>) δ: -4.42 (d, 3F, *J* = 7.6 Hz); MS *m/z*: 246 (M<sup>+</sup>); HRMS Calc. C<sub>12</sub>H<sub>13</sub>O<sub>2</sub>F<sub>3</sub>: 246.09 (M<sup>+</sup>), Found: 246.09; IR (neat) cm<sup>-1</sup>: 1732, 1252, 1036.

## 2-Trifluoromethylcyclohexanone (7i)

Under an atmosphere of Ar, a solution of **1** (ca 1 mL) in THF (2 mL) was added to a mixture of **2i** (0.20 mL, 2 mmol) and RhCl(PPh<sub>3</sub>)<sub>3</sub> (37 mg, 2 mol%) in THF (6 mL) at -30 °C. 1.0 M Et<sub>2</sub>Zn in hexane (3 mL, 3 mmol) was gradually added to the solution at 0 °C, and then the solution was stirred at RT for 0.5 h. The solution was quenched with 10% HCl, and extracted with Et<sub>2</sub>O. The Et<sub>2</sub>O layer was washed with sat. NaCl and dried with MgSO<sub>4</sub>. The solvent was removed *in vacuo* and the residue was purified by column chromatography (AcOEt : Hexane = 1 : 9) to give **7i** (182 mg, 55%). **7i**: colorless oil; <sup>1</sup>H NMR (CDCl<sub>3</sub>) δ: 1.67-1.88 (m, 3H), 1.99-2.03 (m, 1H), 2.07-2.15 (m, 1H), 2.31-2.39 (m, 2H), 2.48-2.53 (m, 1H), 3.08 (m, 1H); <sup>13</sup>C NMR (CDCl<sub>3</sub>) δ: 23.8, 27.1, 27.6 (q, *J* = 2.5 Hz), 42.2 (q, *J* = 1.6 Hz), 53.7 (q, *J* = 25.5 Hz), 124.6 (q, *J* = 278.6 Hz), 202.9; <sup>19</sup>F NMR (CDCl<sub>3</sub>) δ: -6.02 (d, 3F, *J* = 8.3 Hz); MS *m/z*: 166 (M<sup>+</sup>); HRMS Calc. C<sub>7</sub>H<sub>9</sub>OF<sub>3</sub>: 166.06 (M<sup>+</sup>), Found: 166.06; IR (neat) cm<sup>-1</sup>: 2956, 2880, 1730, 1394, 1274.

## 4,4-Dimethyl-2-trifluoromethylcyclohexanone (7j)

Under an atmosphere of Ar, a solution of **1** (ca 1 mL) in THF (2 mL) was added to a mixture of **2j** (0.26 mL, 2 mmol) and RhCl(PPh<sub>3</sub>)<sub>3</sub> (37 mg, 2 mol%) in THF (6 mL) at -30 °C. 1.0 M Et<sub>2</sub>Zn in hexane (3 mL, 3 mmol) was gradually added to the solution at 0 °C, and then the solution was stirred at RT for 0.5 h. The solution was quenched with 10% HCl, and extracted with Et<sub>2</sub>O. The Et<sub>2</sub>O layer was washed with sat. NaCl and dried with MgSO<sub>4</sub>. The solvent was removed *in vacuo* and the residue was purified by column chromatography (AcOEt : Hexane = 1 : 9) to give **7j** (204 mg, 53%). **7j**: colorless oil; <sup>1</sup>H NMR (CDCl<sub>3</sub>) δ: 1.09 (s, 3H), 1.24 (s, 3H), 1.67-1.81 (m, 3H), 1.99 (m, 1H), 2.35 (m, 1H), 2.49 (m, 1H), 3.19 (m, 1H); <sup>13</sup>C NMR (CDCl<sub>3</sub>) δ: 24.0, 30.2, 31.1, 38.4 (q, *J* = 1.7 Hz), 39.3, 39.6 (q, *J* = 2.5 Hz), 49.9 (q, *J* = 24.9 Hz), 124.7 (q, *J* = 280.0 Hz), 203.1; <sup>19</sup>F NMR (CDCl<sub>3</sub>) δ: -6.19 (d, 3F, *J* = 7.6 Hz); MS *m/z*: 194 (M<sup>+</sup>); HRMS Calc. C<sub>9</sub>H<sub>13</sub>OF<sub>3</sub>: 194.09 (M<sup>+</sup>), Found: 194.09; IR (neat) cm<sup>-1</sup>: 2968, 2880, 1734, 1388, 1310, 1286, 1264, 1174, 1146, 1082.

## References

1. Ohno, H.; Okumura, M.; Maeda, S.; Iwasaki, H.; Wakayama, R.; Tanaka, T. *J. Org. Chem.* **2003**, *68*, 7722-7732.
2. Frattini, S.; Quai, M.; Cereda, E. *Tetrahedron Lett.* **2001**, *42*, 6827-6829.

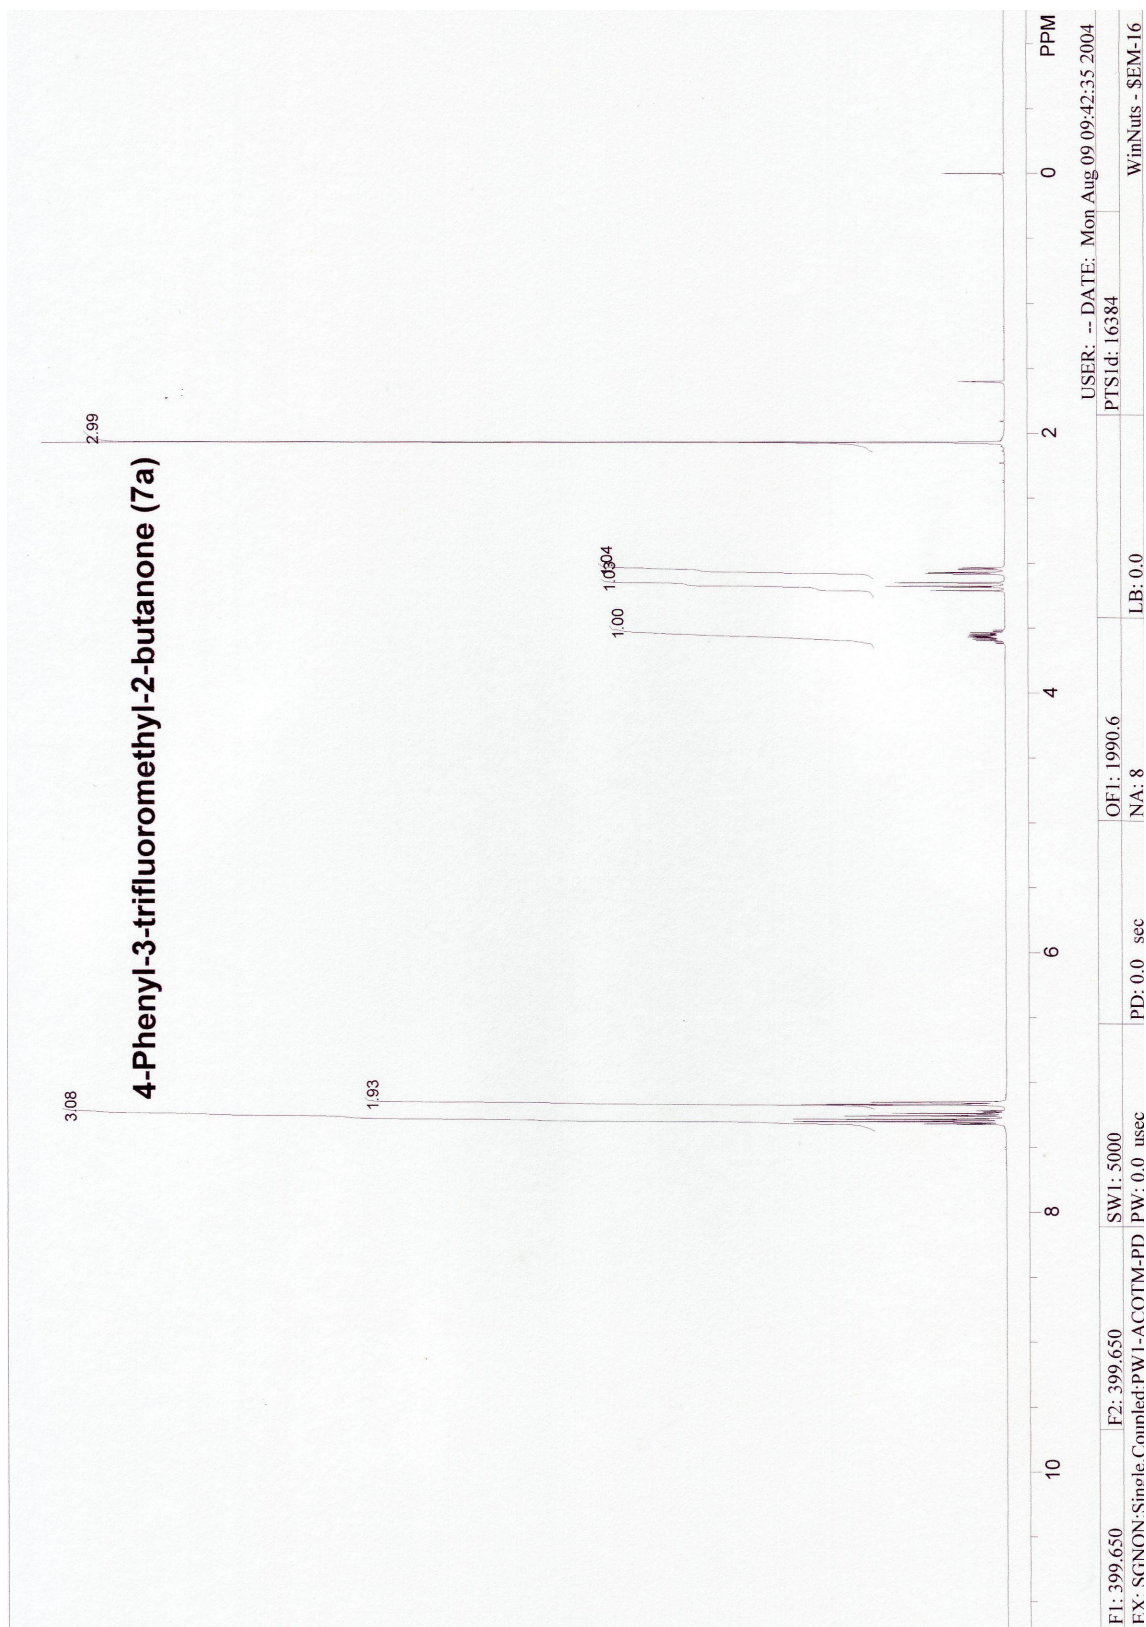



1,3-Diphenyl-2-trifluoromethyl-1-propanone (7b)

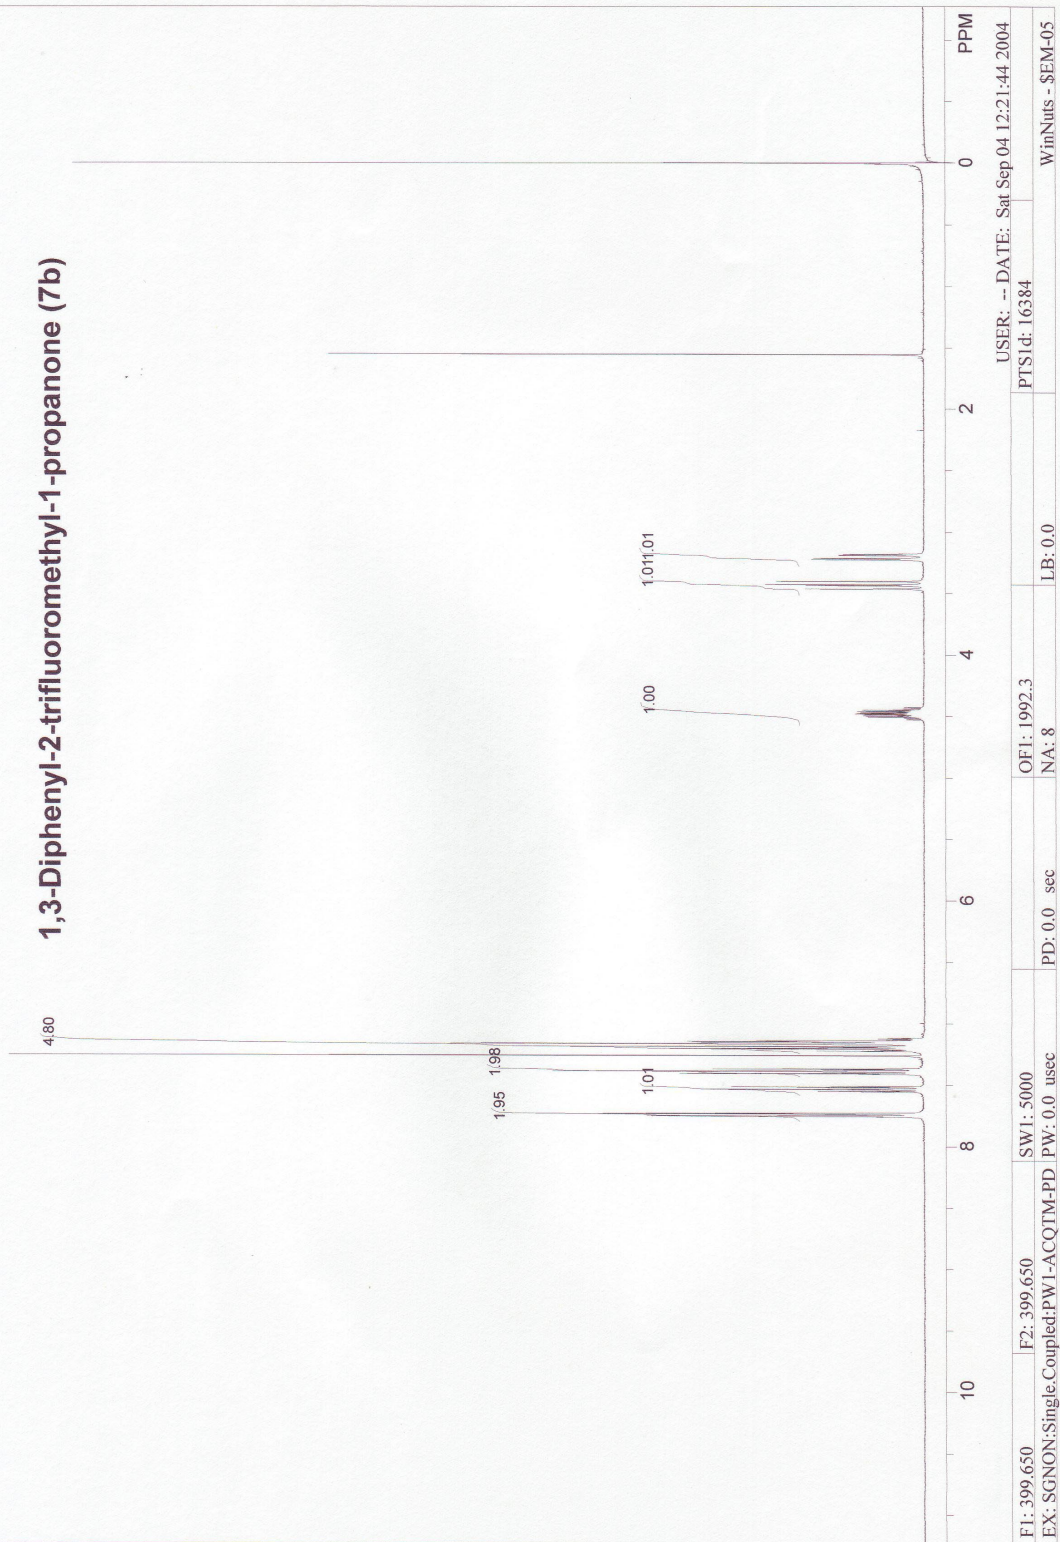

# 1-Phenyl-2-trifluoromethyl-1-pentanone (7c)

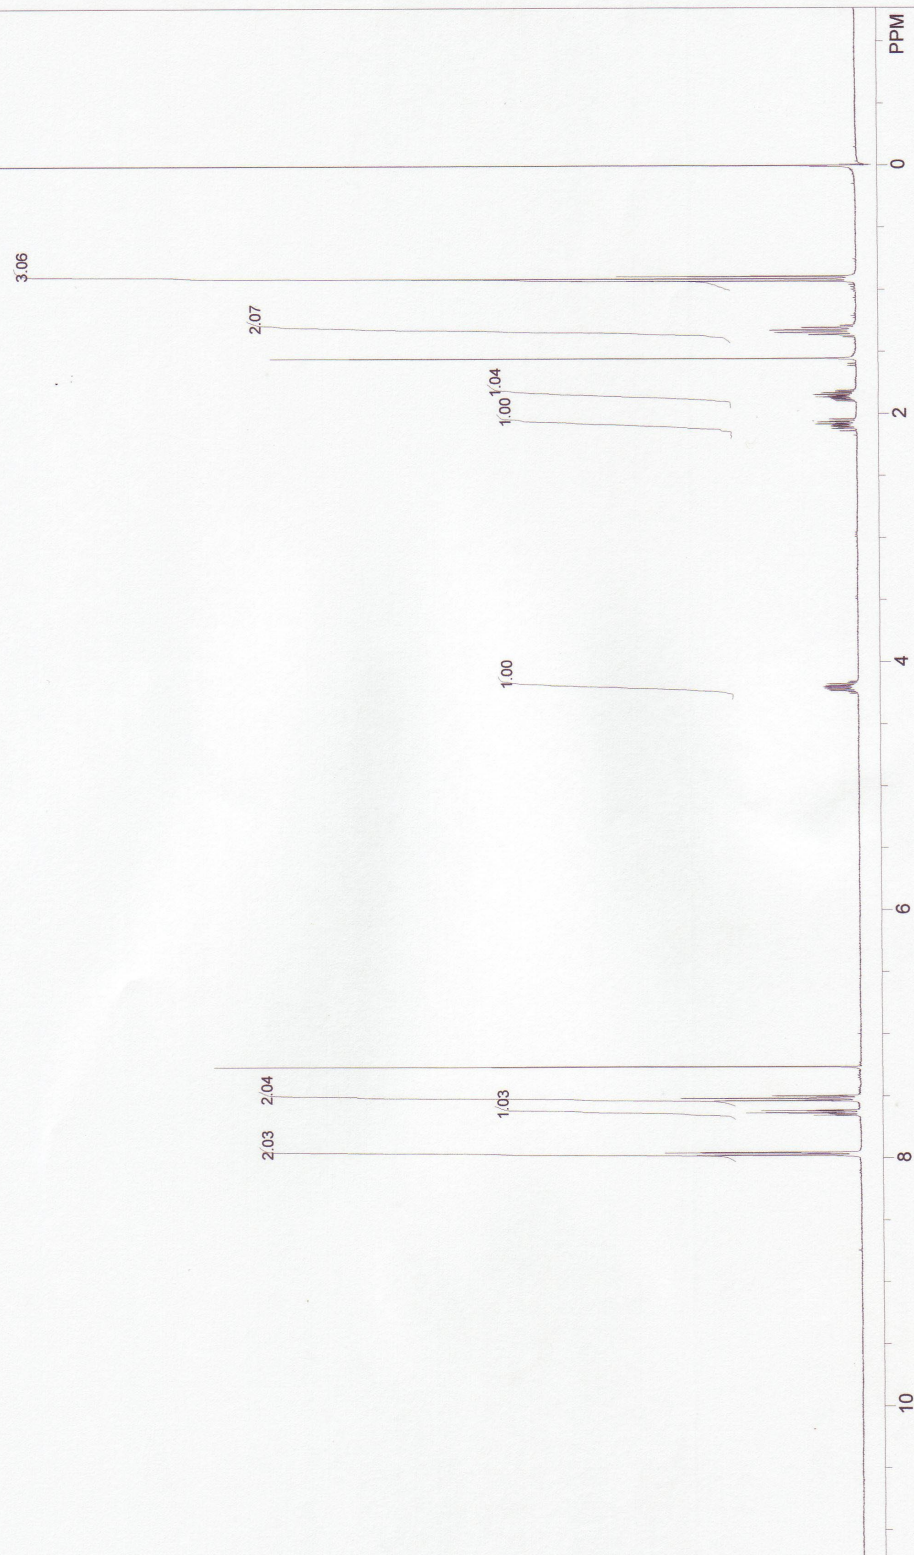

|                                         |              |             |             |             |                                         |
|-----------------------------------------|--------------|-------------|-------------|-------------|-----------------------------------------|
| F1: 399.650                             | F2: 399.650  | SW1: 5000   | OF1: 1993.3 | PTSD: 16384 | USER: -- DATE: Sat Sep 11 11:23:52 2004 |
| EX: SGNON: Single Coupled: PW1-ACQTM-PD | PW: 0.0 usec | PD: 0.0 sec | NA: 8       | LB: 0.0     | WinNuts - SEM-24                        |



# 3-Trifluoromethyl-2-nonanone (7e)

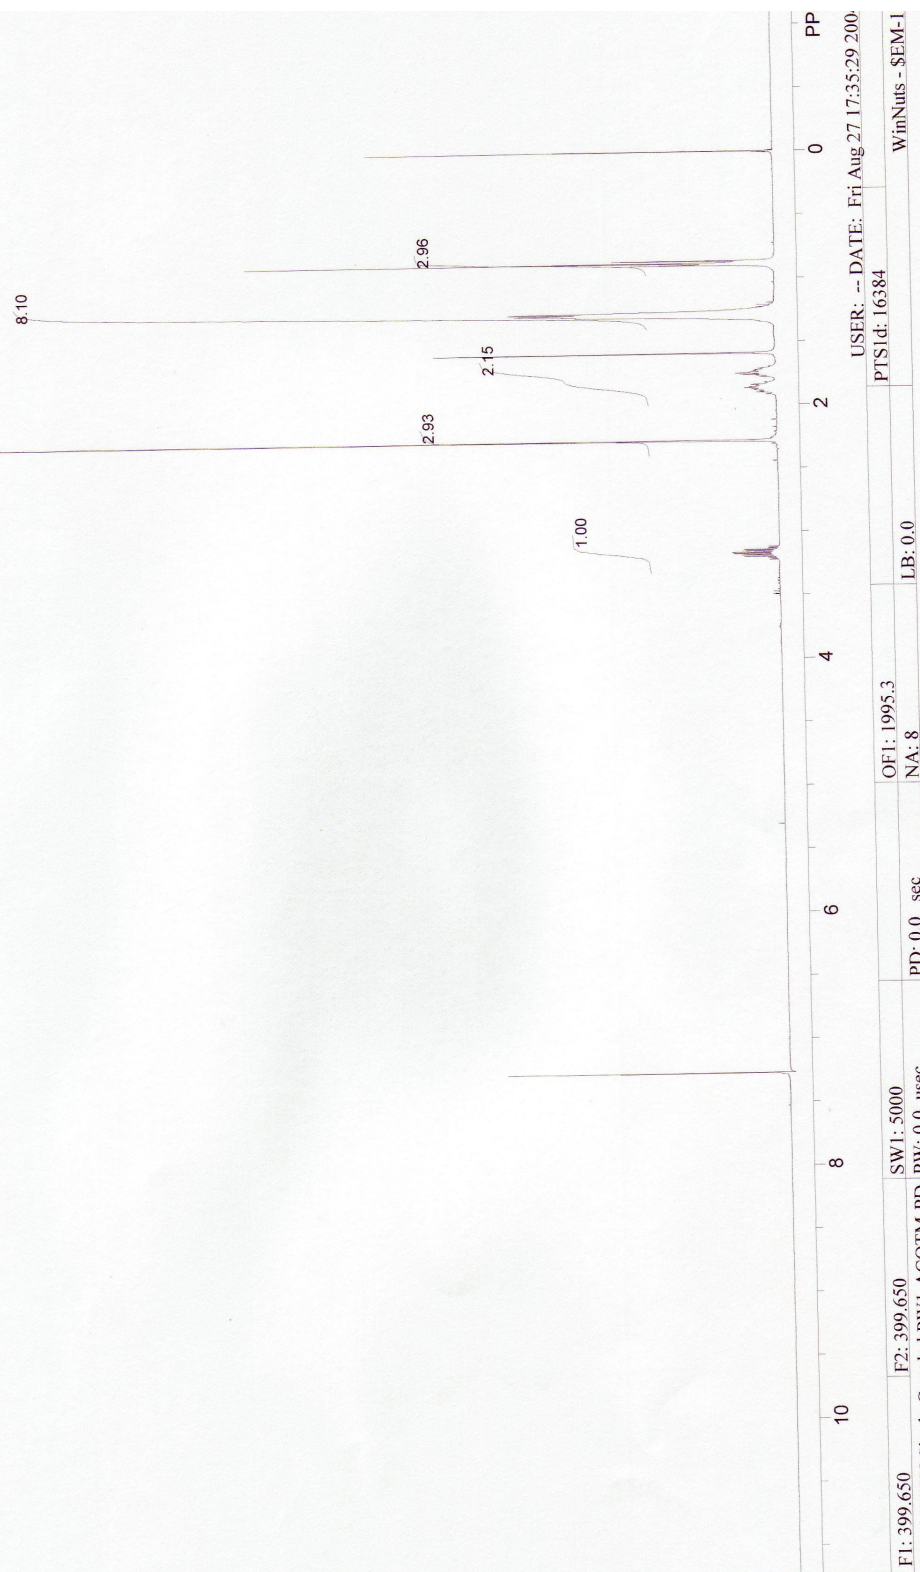

**2-Methyl-1,1,1-trifluoro-3-octanone (7f)**

water

CH<sub>2</sub>

7.40

3.08

3.09

2.16

1.00

0.92

PPM

10 8 6 4 2 0

USER: -- DATE: Thu Aug 19 12:30:30 200

PTSID: 16384

WinNuts - \$EM-1

FI: 399.650 F2: 399.650 SW1: 5000

PD: 0.0 sec

NA: 8

OF1: 1994.7

LB: 0.0



**Methyl 4-(3-oxo-2-trifluoromethyl-butyl)benzoate (7g)**

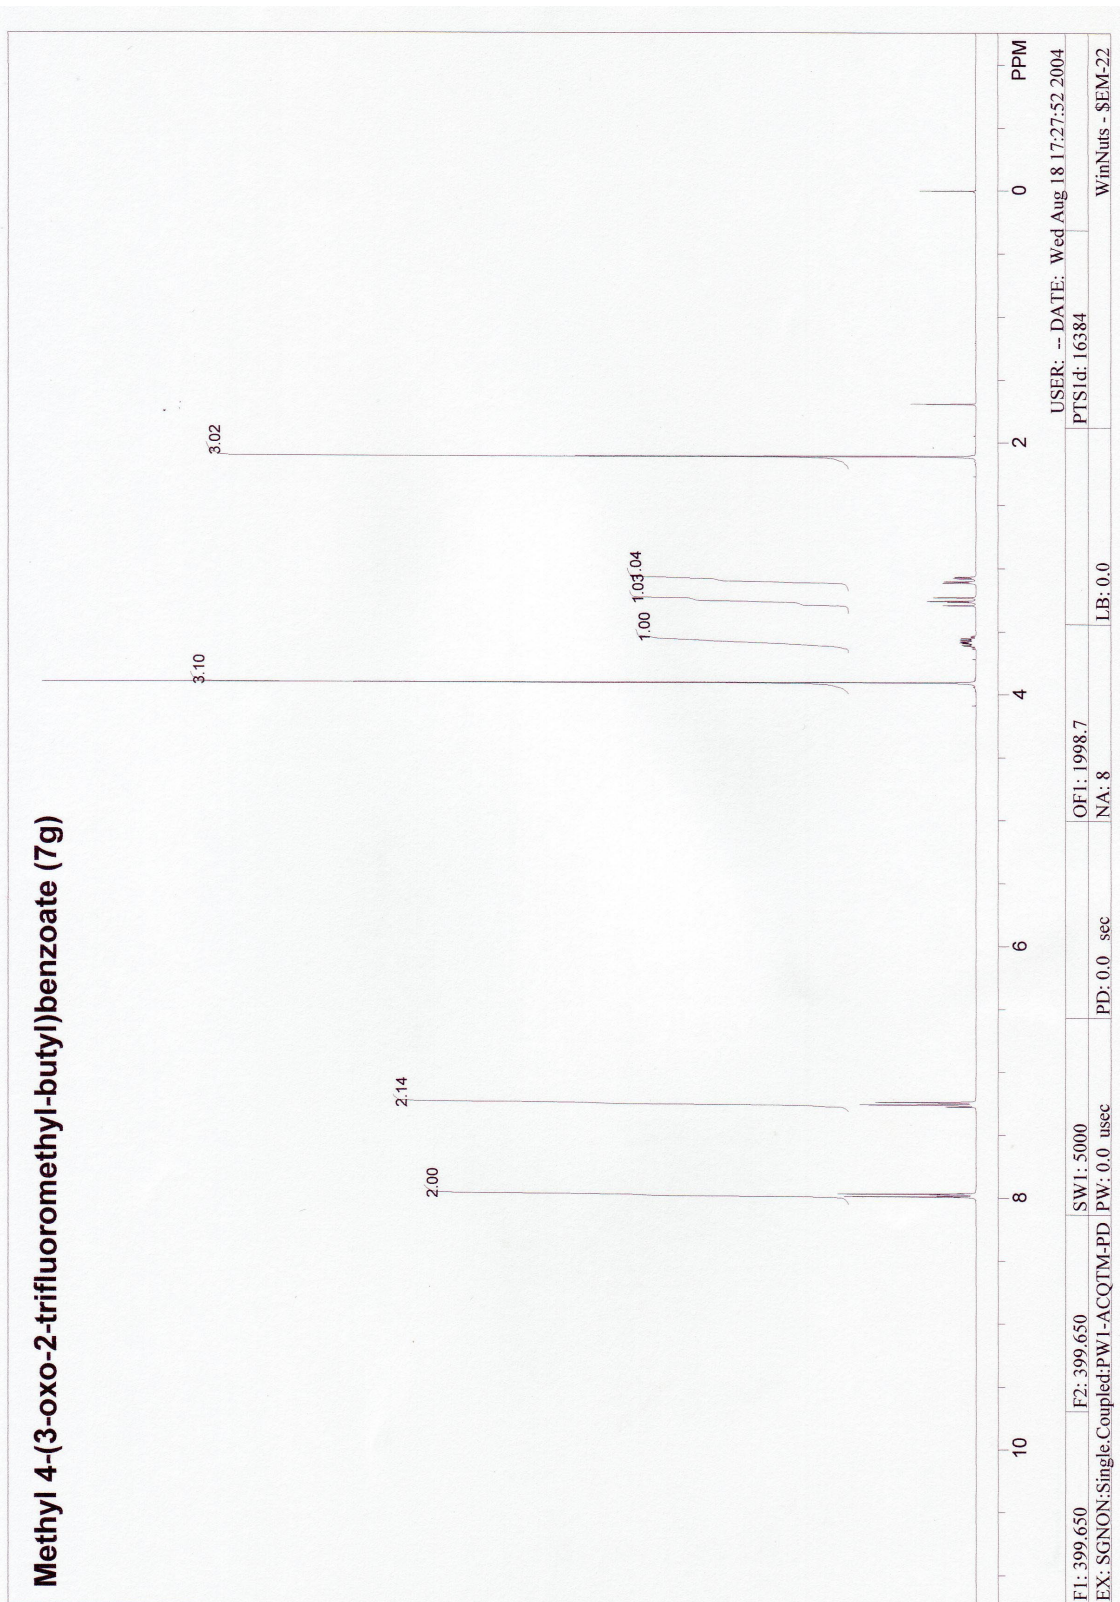

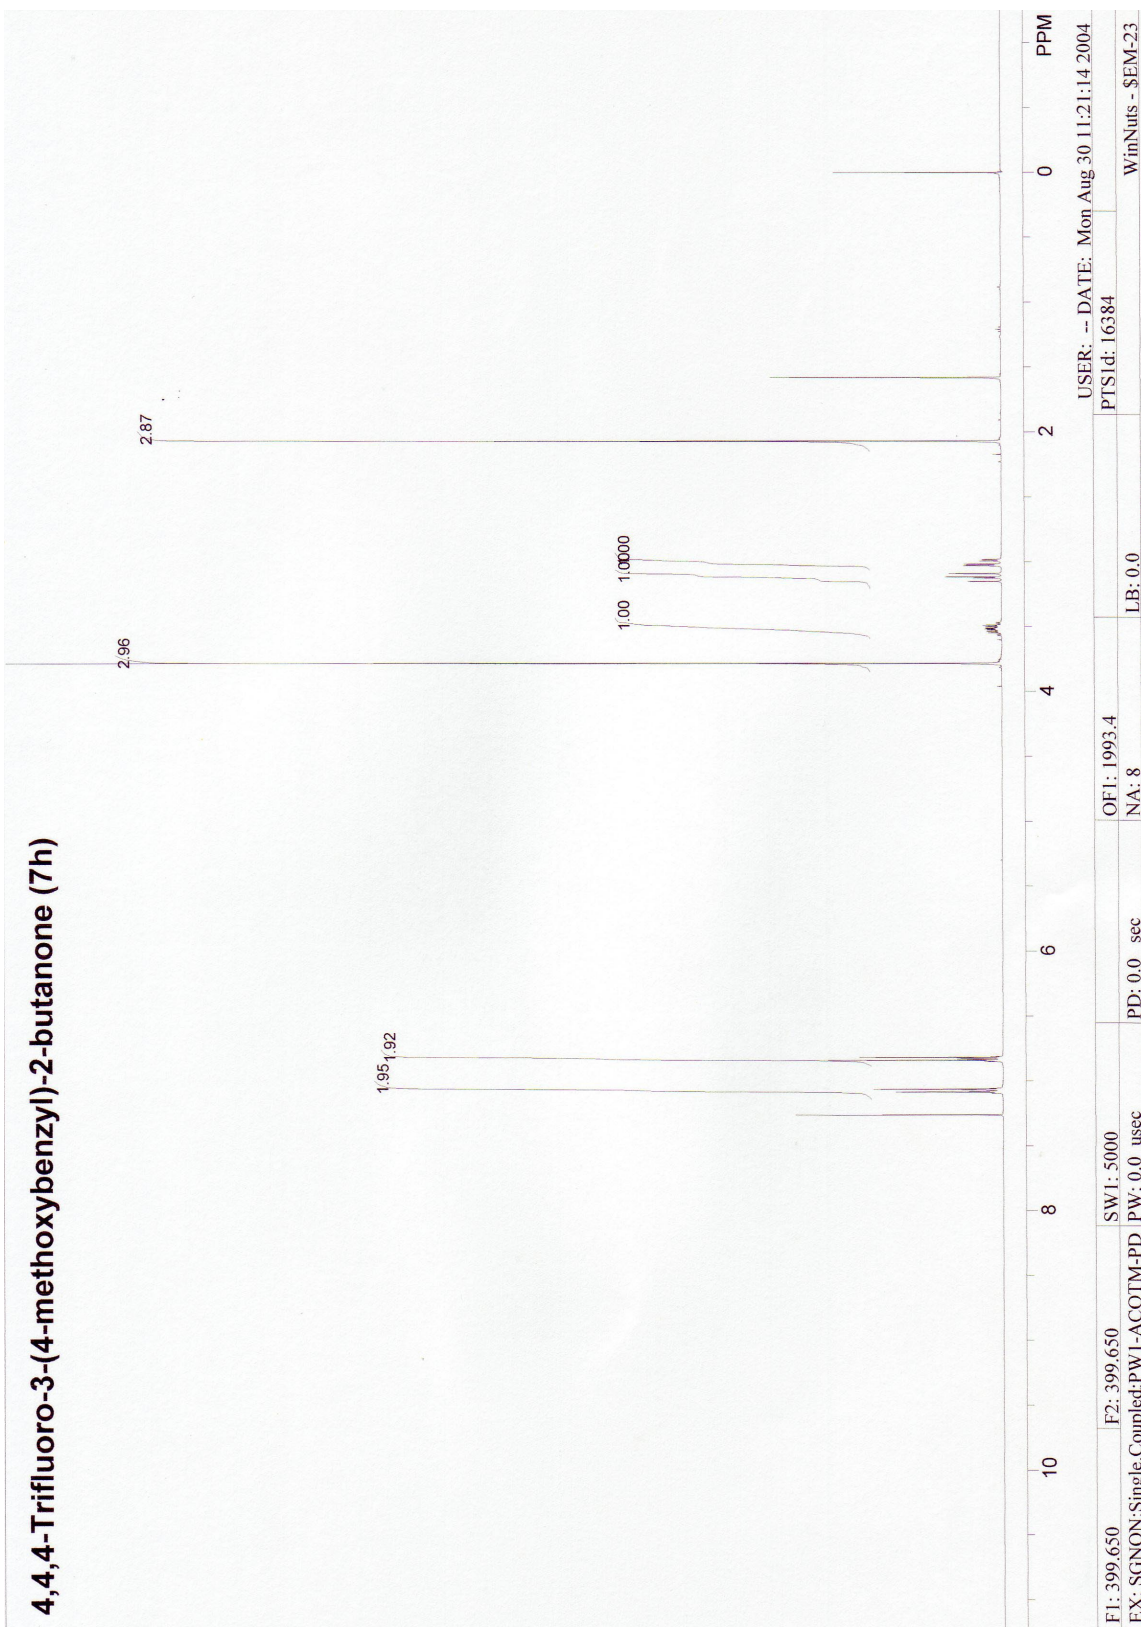



# 2-Trifluoromethylcyclohexanone (7i)

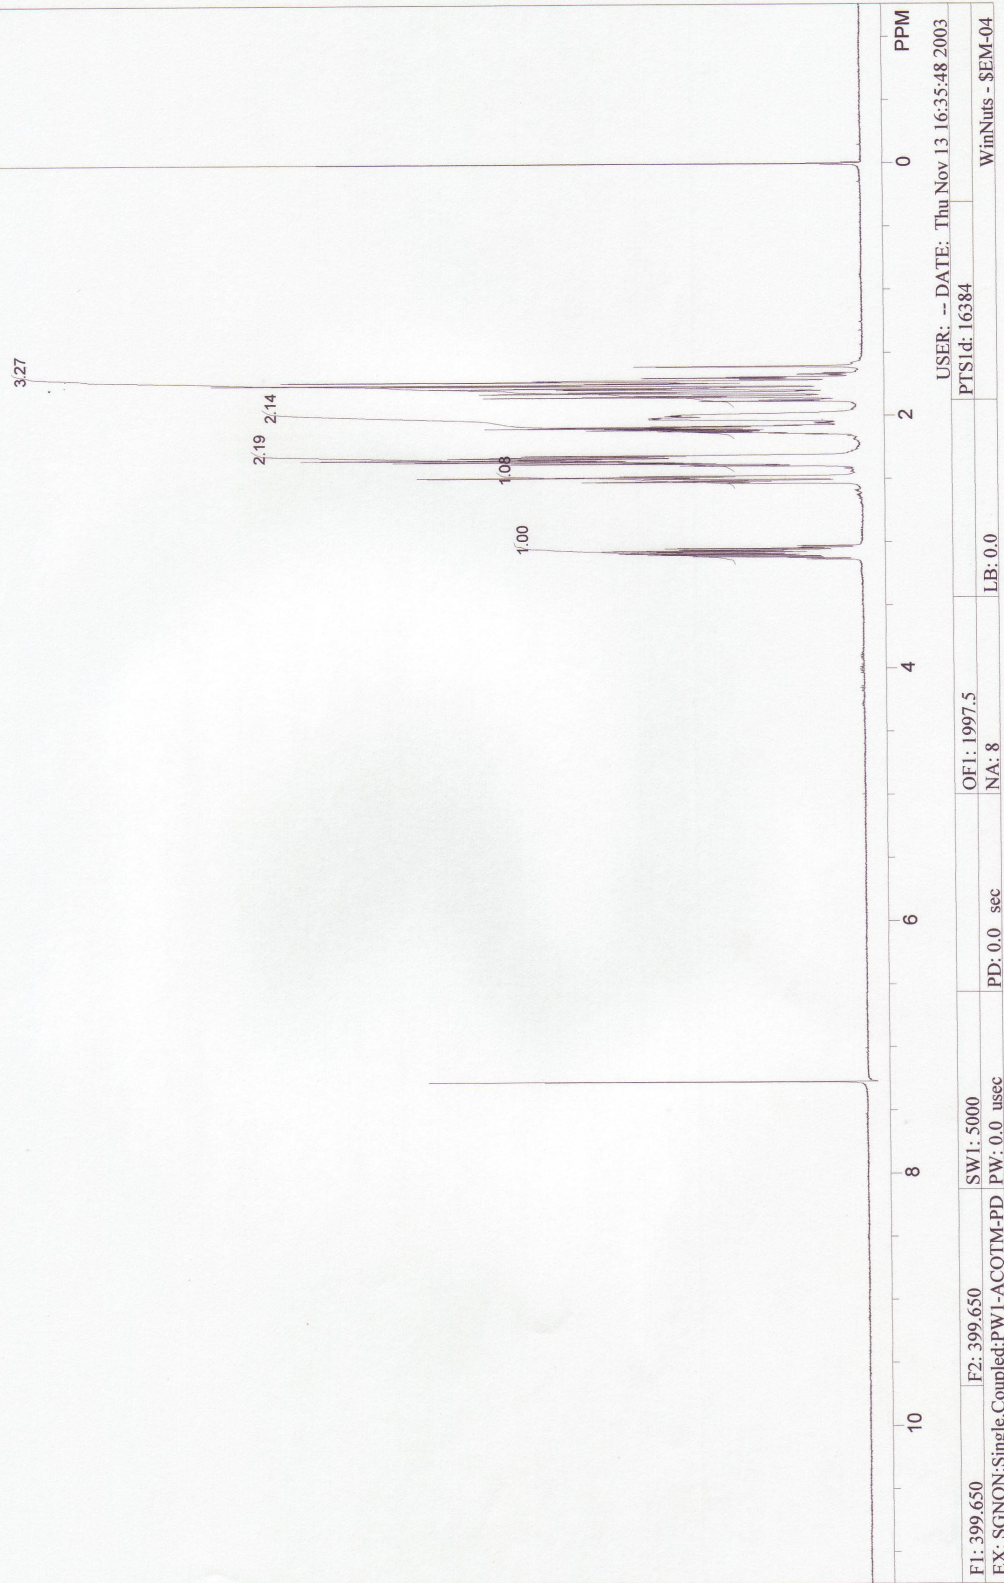



# 4,4-Dimethyl-2-trifluoromethylcyclohexanone (7j)

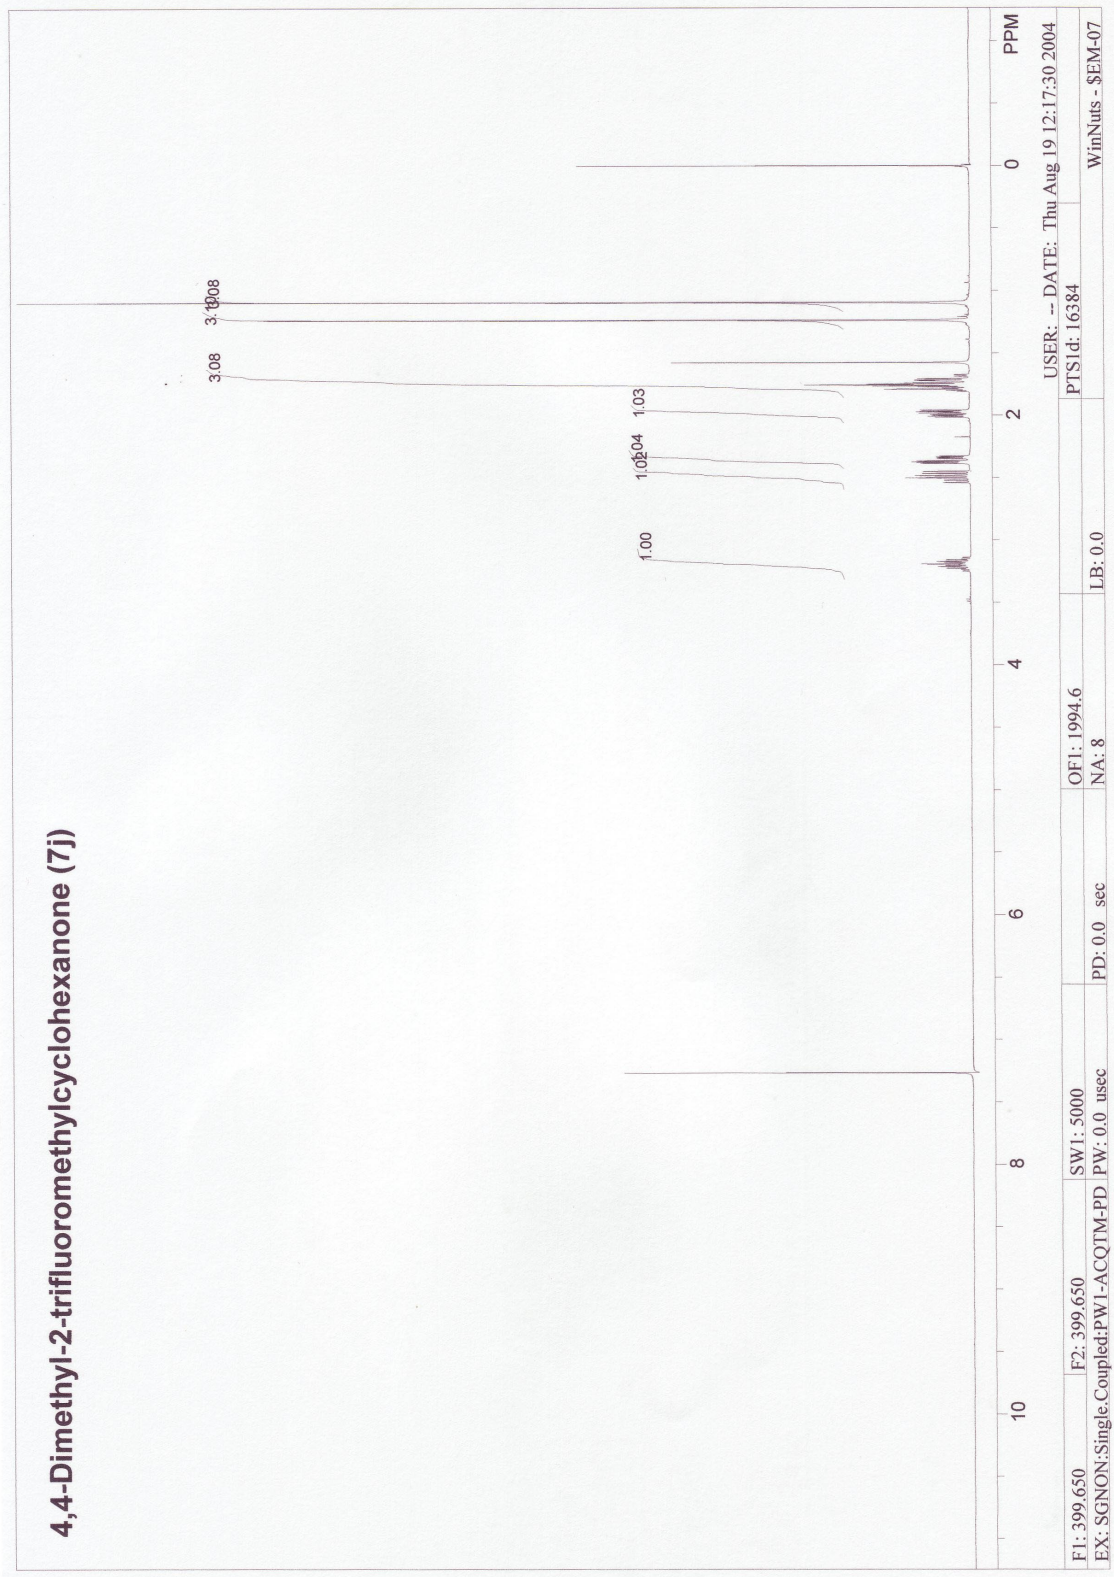

Supplement: Supplementary file 1 [file 5155063]
